# Supplementary material for: Phototransformation of 5-nitro-2-furaldehyde in aqueous solution. A laser flash photolysis and product analysis study
Source: Royal Society of Chemistry journal article supplement (doi:10.1039/c6pp00423g), 2017-02-27
Supplement: c6pp00423g2.pdf [file c6pp00423g2.pdf]

**Table ESI1.** Dependence of the first-order rate constant ( $k_{\text{obs}}$ ) for the decay of  $^3\text{NFA}^*$  on the ground-state concentration of NFA ( $[\text{NFA}]$ )

| acetonitrile                                   |                                    | 1,4-dioxane                                    |                                    | acetone                                        |                                    | hexane                                         |                                    |
|------------------------------------------------|------------------------------------|------------------------------------------------|------------------------------------|------------------------------------------------|------------------------------------|------------------------------------------------|------------------------------------|
| $[\text{NFA}]$<br>$/10^{-4}\text{mol dm}^{-3}$ | $k_{\text{obs}}/10^5\text{s}^{-1}$ |
| 0.37                                           | 2.56                               | 0.16                                           | 5.22                               | 0.29                                           | 3.08                               | 4.35                                           | 87.50                              |
| 0.38                                           | 3.44                               | 1.55                                           | 8.06                               | 0.58                                           | 3.43                               | 43.50                                          | 153.0                              |
| 0.55                                           | 3.20                               | 15.5                                           | 12.7                               | 1.55                                           | 5.01                               |                                                |                                    |
| 0.73                                           | 4.64                               |                                                |                                    | 3.45                                           | 7.78                               |                                                |                                    |
| 0.76                                           | 4.61                               |                                                |                                    | 5.75                                           | 10.20                              |                                                |                                    |
| 1.47                                           | 4.75                               |                                                |                                    | 7.73                                           | 12.60                              |                                                |                                    |
| 3.02                                           | 8.57                               |                                                |                                    |                                                |                                    |                                                |                                    |
| 3.66                                           | 7.93                               |                                                |                                    |                                                |                                    |                                                |                                    |
| 7.33                                           | 9.34                               |                                                |                                    |                                                |                                    |                                                |                                    |
| 11.00                                          | 10.30                              |                                                |                                    |                                                |                                    |                                                |                                    |
| 34.60                                          | 11.70                              |                                                |                                    |                                                |                                    |                                                |                                    |
| 37.80                                          | 11.60                              |                                                |                                    |                                                |                                    |                                                |                                    |
| 43.20                                          | 11.50                              |                                                |                                    |                                                |                                    |                                                |                                    |
